# Supplementary material for: Immunomodulatory Effect of Gut Microbiota-Derived Bioactive Peptides on Human Immune System from Healthy Controls and Patients with Inflammatory Bowel Disease
Source: MDPI journal article supplement (doi:10.3390/nu11112605), 2019-10-31
Supplement: s1 [file s1]

**Table S1.** Demographics of healthy controls for experiments on intestinal cytokine production.

| <b>Patient</b> | <b>Age</b> | <b>Gender</b> | <b>Mucosal status</b> | <b>Treatment</b> |
|----------------|------------|---------------|-----------------------|------------------|
| HC1            | 73         | Male          | Healthy               | Untreated        |
| HC2            | 68         | Female        | Healthy               | Untreated        |
| HC3            | 72         | Female        | Healthy               | Untreated        |
| HC4            | 72         | Male          | Healthy               | Untreated        |
| HC5            | 40         | Female        | Healthy               | Untreated        |
| HC6            | 43         | Male          | Healthy               | Untreated        |
| HC7            | 31         | Female        | Healthy               | Untreated        |
| HC8            | 66         | Female        | Healthy               | Untreated        |
| HC9            | 42         | Female        | Healthy               | Untreated        |
| HC10           | 53         | Female        | Healthy               | Untreated        |

Demographics of healthy controls (HC) used to evaluate the intestinal cytokine production (Figure 1 and Table 1), including age, gender, mucosal status and treatment.

**Table S2.** Demographics of healthy controls for experiments on circulating antigen presenting cells.

| <b>Patient</b> | <b>Age</b> | <b>Gender</b> | <b>Mucosal status</b> | <b>Treatment</b> |
|----------------|------------|---------------|-----------------------|------------------|
| HC11           | 35         | Male          | Healthy               | Untreated        |
| HC12           | 41         | Female        | Healthy               | Untreated        |
| HC13           | 36         | Male          | Healthy               | Untreated        |
| HC14           | 20         | Male          | Healthy               | Untreated        |
| HC15           | 49         | Male          | Healthy               | Untreated        |
| HC16           | 50         | Female        | Healthy               | Untreated        |
| HC17           | 28         | Female        | Healthy               | Untreated        |
| HC18           | 66         | Male          | Healthy               | Untreated        |
| HC19           | 30         | Male          | Healthy               | Untreated        |
| HC20           | 35         | Male          | Healthy               | Untreated        |

Demographics of healthy controls (HC) used to characterize the circulating antigen presenting cell subsets (Figures 2-4 and Supplementary Figures S1-S2), including age, gender, mucosal status and treatment.

**Table S3.** Patient demographics for experiments on intestinal cytokine production.

| Patient | Age | Gender | IBD type | Endoscopic score <sup>a</sup> |    | Sample location | Montreal classification <sup>b</sup> |    | Treatment                 | Smoking |
|---------|-----|--------|----------|-------------------------------|----|-----------------|--------------------------------------|----|---------------------------|---------|
|         |     |        |          | CD                            | UC |                 | CD                                   | UC |                           |         |
| IBD1    | 25  | Male   | CD       | 9                             | -  | Terminal ileum  | A2, L1, B1                           | -  | Ustekinumab               | Yes     |
| IBD2    | 58  | Male   | CD       | 9                             | -  | Left colon      | A3, L2, B1                           | -  | Inflectra                 | No      |
| IBD3    | 22  | Male   | CD       | 18                            | -  | Right colon     | A1, L3, B1                           | -  | Vedolizumab               | No      |
| IBD4    | 32  | Male   | CD       | 10                            | -  | Terminal ileum  | A2, L3, B3                           | -  | Azathioprine + adalimumab | Yes     |
| IBD5    | 35  | Male   | CD       | 6                             | -  | Left colon      | A2, L2, B1                           | -  | Mesalazine                | No      |
| IBD6    | 66  | Female | UC       | -                             | 2  | Left colon      | -                                    | E3 | Adalimumab                | No      |
| IBD7    | 38  | Male   | UC       | -                             | 3  | Left colon      | -                                    | E2 | Mesalazine                | No      |
| IBD8    | 39  | Male   | UC       | -                             | 3  | Left colon      | -                                    | E3 | Azathioprine + golimumab  | No      |

Demographics of inflammatory bowel disease (IBD) patients used to evaluate the intestinal cytokine production (Figure 1 and Table 1), including age, gender, IBD type, endoscopic score, sample location, Montreal classification, treatment and smoking habit at the time of the colonoscopy. CD: Crohn's disease; UC: Ulcerative colitis. <sup>a</sup> Mucosal status as defined by endoscopic assessment (CD: simplified endoscopic activity score for CD; UC: Mayo endoscopic score). <sup>b</sup> Montreal classification of IBD [CD, Age at diagnosis: A1 (< 16 years), A2 (17-40 years), A3 (> 40 years); Location: L1 (ileal), L2 (colonic), L3 (ileocolonic); Behaviour: B1 (inflammatory), B2 (structuring), B3 (penetrating). UC, Extent: E1 (proctitis), E2 (left sided), E3 (extensive)].

**Table S4.** Patient demographics for experiments on circulating antigen presenting cells.

| Patient | Age | Gender | IBD type | Endoscopic score <sup>a</sup> |    | Montreal classification <sup>b</sup> |    | Treatment                               | Smoking |
|---------|-----|--------|----------|-------------------------------|----|--------------------------------------|----|-----------------------------------------|---------|
|         |     |        |          | CD                            | UC | CD                                   | UC |                                         |         |
| IBD9    | 22  | Male   | CD       | 18                            | -  | A1, L3, B1                           | -  | Vedolizumab                             | No      |
| IBD10   | 32  | Male   | CD       | 10                            | -  | A2, L3, B3                           | -  | Azathioprine + adalimumab               | Yes     |
| IBD11   | 25  | Male   | CD       | 6                             | -  | A2, L1, B1                           | -  | Azathioprine                            | No      |
| IBD12   | 51  | Female | CD       | 6                             | -  | A2, L2, B3                           | -  | Azathioprine + certolizumab pegol       | No      |
| IBD13   | 70  | Female | CD       | 4                             | -  | A3, L3, B1                           | -  | Mesalazine                              | No      |
| IBD14   | 46  | Male   | UC       | -                             | 3  | -                                    | E2 | Mesalazine + inflectra                  | No      |
| IBD15   | 47  | Male   | UC       | -                             | 2  | -                                    | E2 | Mesalazine + prednisolone + etrolizumab | No      |
| IBD16   | 34  | Male   | UC       | -                             | 2  | -                                    | E2 | Mesalazine                              | No      |
| IBD17   | 40  | Male   | UC       | -                             | 3  | -                                    | E3 | Mesalazine + azathioprine + etrolizumab | No      |

Demographics of inflammatory bowel disease (IBD) patients used to characterize the circulating antigen presenting cell subsets (Figures 2-4 and Supplementary Figures S1-S2), including age, gender, IBD type, endoscopic score, Montreal classification, treatment and smoking habit at the time of the colonoscopy. CD: Crohn's

disease; UC: Ulcerative colitis. <sup>a</sup> Mucosal status as defined by endoscopic assessment (CD: simplified endoscopic activity score for CD; UC: Mayo endoscopic score).  
<sup>b</sup> Montreal classification of IBD [CD, Age at diagnosis: A1 (< 16 years), A2 (17-40 years), A3 (> 40 years); Location: L1 (ileal), L2 (colonic), L3 (ileocolonic); Behaviour: B1 (inflammatory), B2 (structuring), B3 (penetrating). UC, Extent: E1 (proctitis), E2 (left sided), E3 (extensive)].

**Table S5.** Flow cytometry antibodies.

| <b>Antibody Specificity</b> | <b>Clone</b> | <b>Fluorochrome</b> | <b>Manufacturer</b> |
|-----------------------------|--------------|---------------------|---------------------|
| IL-10                       | JES3-9D7     | BV421               | Biolegend           |
| HLA-DR                      | L243         | BV570               | Biolegend           |
| CCR2                        | K036C2       | BV605               | Biolegend           |
| CD40                        | 5C3          | BV711               | Biolegend           |
| CD123                       | 7G3          | FITC                | Becton Dickinson    |
| CD14                        | MoP9         | PECF594             | Becton Dickinson    |
| CD19                        | HIB19        | PE-Cy5              | Becton Dickinson    |
| IL-1 $\beta$                | JK1B-1       | APC                 | Biolegend           |
| CD11c                       | Bu15         | Alexa700            | Biolegend           |

Specificity, clone, fluorochrome and manufacturer of the different monoclonal antibodies used in the study.

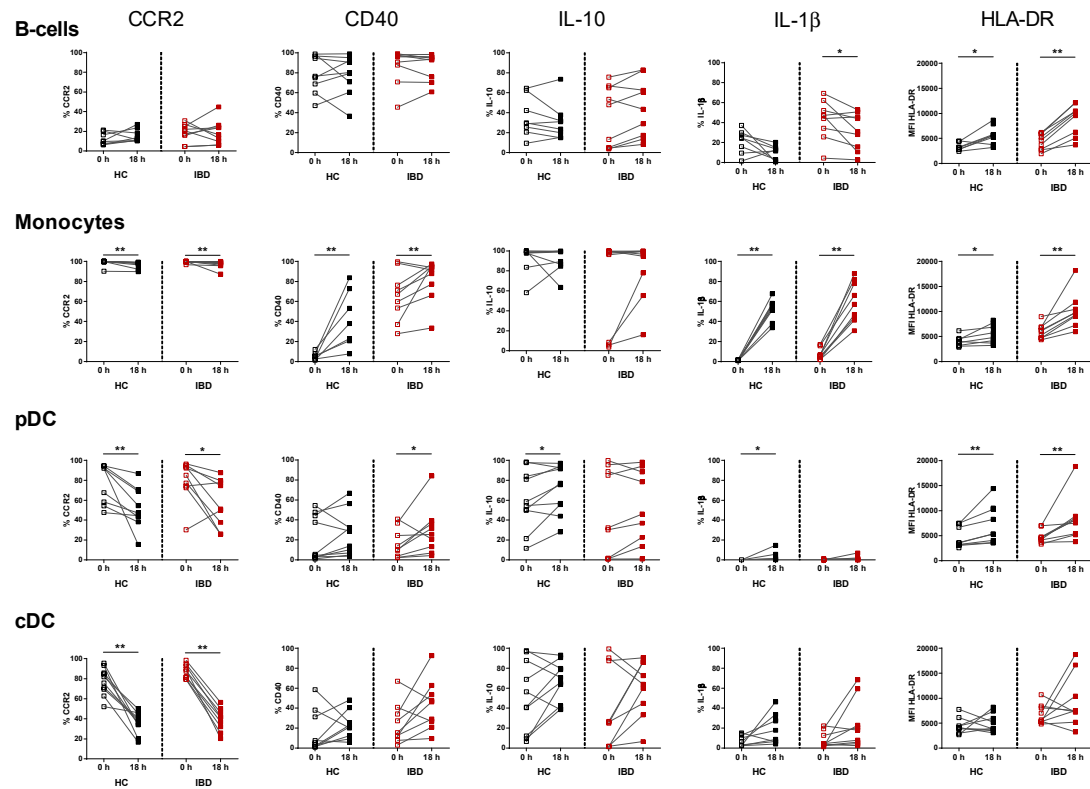

**Figure S1.** Culture effect over circulating antigen presenting cells. B-cells, monocytes, plasmacytoid dendritic cells –pDC– and conventional dendritic cells –cDC–, from healthy controls (HC) and patients with inflammatory bowel disease (IBD) were identified as in Figure 2. Cells were characterized for the expression of CCR2, CD40, IL-10, IL-1 $\beta$  and HLA-DR within each subset in HC and IBD patients, both in fresh samples (0 h) as well as after overnight culture in resting conditions (18 h). Results are expressed as percentage of positive cells (%) for CCR2, CD40, IL-10 and IL-1 $\beta$  or by the median fluorescence intensity (MFI) for HLA-DR in each given subset. Wilcoxon paired test were applied to compare the basal (0 h) and post-culture (18 h) expression of CCR2, CD40, IL-10, IL-1 $\beta$  and HLA-DR within each subset in HC and IBD patients. P-values < 0.05 were considered significant (\* < 0.05, \*\* < 0.01).

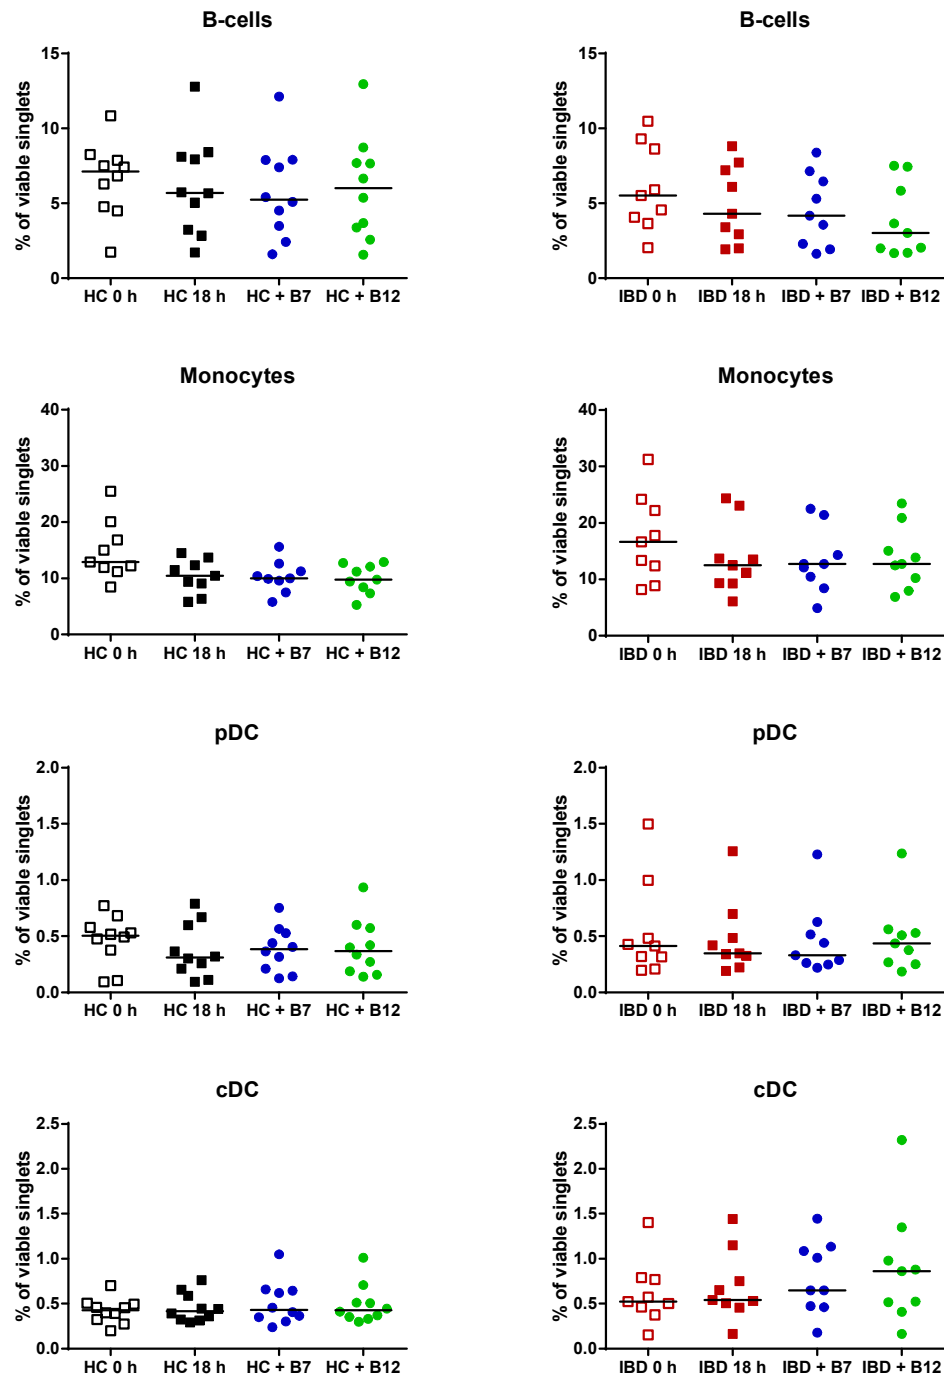

**Figure S2.** Proportion of human circulating antigen presenting cells. The proportion of B-cells, monocytes, plasmacytoid dendritic cells –pDC– and conventional dendritic cells –cDC– subsets was determined within total singlet viable cells from both healthy controls (HC) and inflammatory bowel disease (IBD) patients. Cell proportion was determined both in fresh samples (0 h), as well as after overnight culture in resting conditions (18 h) or in the presence of bacterial peptides (B7 and B12). Data were analysed statistically by one-way ANOVA with Dunnet comparison test. .
